# Supplementary material
Source: PubMed Central journal article supplement (PMC2867404)
Supplement: 00261.2009v2_2.pdf [file 00261.2009v2_2.pdf]

**Corrected Legend for Figure 7**

Figure 7. Real-time RT-PCR. cDNA derived from A) lung homogenate (n=5), B) tracheal muscle (n=4) and C) urinary bladder (n=4) from M3R<sup>+/+</sup> and M3R<sup>-/-</sup> mice, each.  $\Delta$ CT values were calculated for M2R and M3R using  $\beta$ -MG as reference gene and PCR-products of M2R, M3R and  $\beta$ -MG separated on agarose gels. A), B), and C) originate from the same gel, each, after excluding irrelevant samples. Boxplots: percentiles 0, 25, median, 75, 100; extreme values (o), outlier ( $\square$ ); n=number of animals; n.s.=not significant.
