# Supplementary material
Source: PubMed Central journal article supplement (PMC2867404)

Figure 7 - As submitted

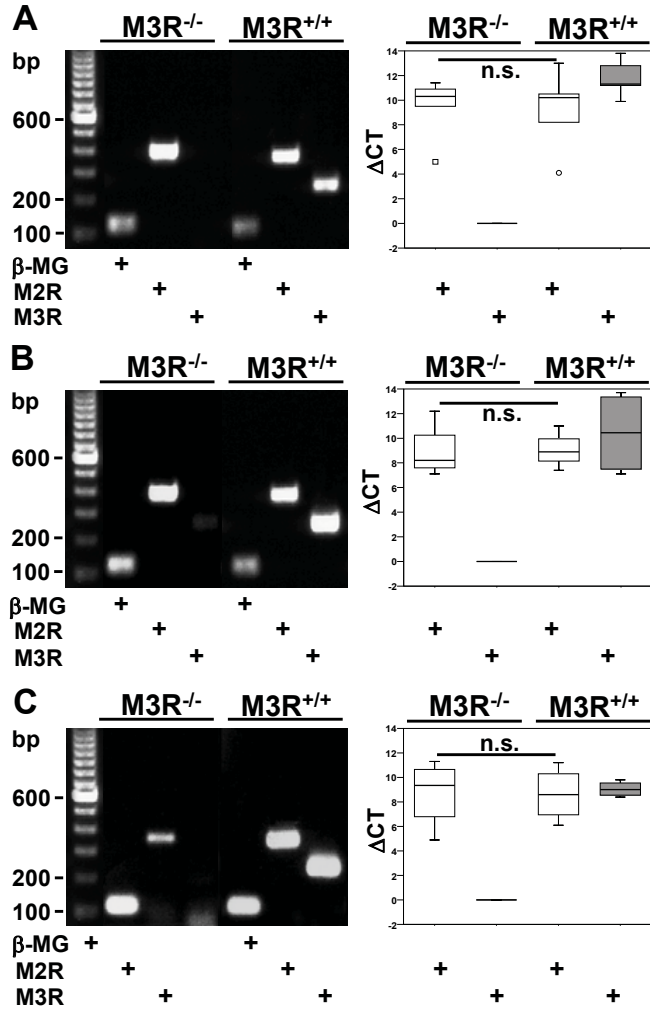

Colored boxes define each piece of spliced gel.

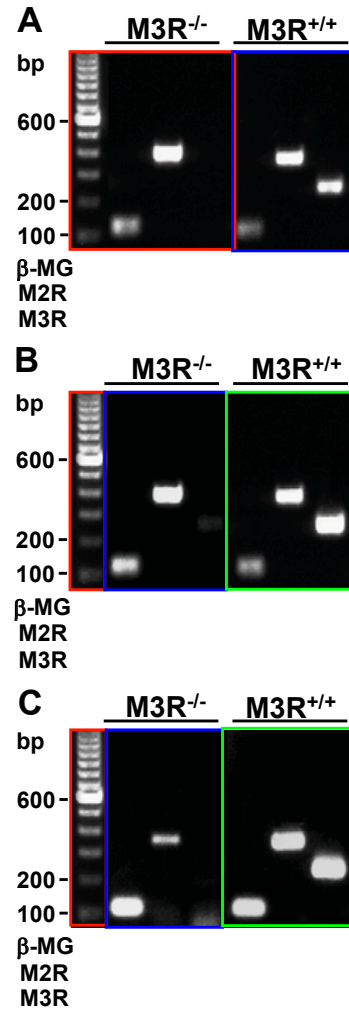

Spliced pieces separated.

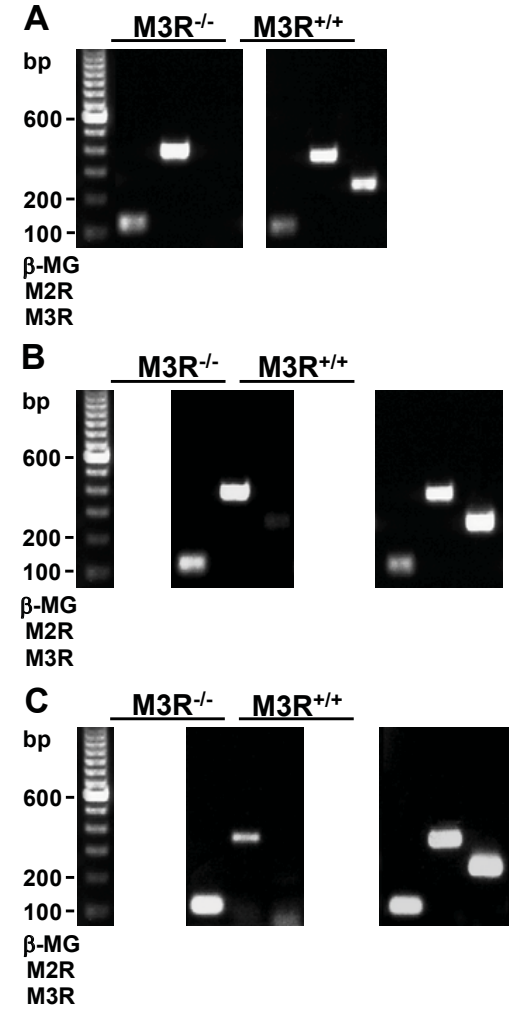

Supplement: 00261.2009v2_1.pdf [file 00261.2009v2_1.pdf]
